# Supplementary material
Source: Research Square preprint supplement (doi:10.21203/rs.3.rs-9587537/v1)
Supplement: Supplementary file 1 [file 3ae5114bc273f34553e7dc35.docx]

| **Demographic Characteristics** | **Frequency** | **Percent** |
| --- | --- | --- |
| **Gender** |  |  |
| - Female | 264 | 65.509 |
| - Male | 139 | 34.491 |
| **Age [M ± SD]** | [37.891±13.208] | |
| **Marital Status** |  | |
| - Single | 181 | 44.913 |
| - Married | 198 | 49.132 |
| - Widowed/Divorced/Separated | 24 | 5.955 |
| **Education level** |  |  |
| - No formal education | 3 | 0.744 |
| - Primary education | 27 | 6.700 |
| - Lower secondary education | 23 | 5.707 |
| - Upper secondary education/Vocational certificate | 70 | 17.370 |
| - Diploma/Higher vocational certificate | 146 | 36.228 |
| - Bachelor’s degree | 134 | 33.251 |
| **Duration of residence in the community [M ± SD]** [32.854±17.869] | | |
| **Occupation** |  |  |
| - Employee (private/company sector) | 130 | 32.258 |
| - Business owner/Self-employed | 105 | 26.055 |
| - Government officer/State enterprise employee | 54 | 13.400 |
| - Student | 40 | 9.926 |
| - Farmer | 39 | 9.677 |
| - General laborer | 30 | 7.444 |
| - Unemployed | 5 | 1.241 |
| **Average monthly income [M ± SD]** | [21382.630±12913.684] | |
| **Chronic conditions** |  |  |
| - No | 352 | 87.345 |
| - Yes | 51 | 12.655 |

*1 USD ≈ 32.70 THB (2 April 2026 exchange rate)

**Table 1.** **Demographic Characteristics of Participants (n = 403)**

| **Variables** | **M** | **SD** | **Level** |
| --- | --- | --- | --- |
| Access to health information | 3.623 | 0.672 | moderate |
| Understanding of health information | 3.675 | 0.708 | moderate |
| Appraisal of health information | 3.705 | 0.667 | moderate |
| Decision-making for self-protection against PM₂.₅ | 3.719 | 0.660 | moderate |
| Self-management based on health recommendations | 3.698 | 0.704 | moderate |
| Media literacy in health | 3.676 | 0.694 | moderate |
| **Overview of health literacy** | **3.742** | **0.378** | **moderate** |
| health monitoring and prevention of PM₂.₅ exposure | 3.742 | 0.378 | moderate |
| protective behaviors to reduce PM₂.₅ exposure | 3.659 | 0.413 | moderate |
| **Overview of preventive health behaviors against PM₂.₅** | **3.700** | **0.373** | **moderate** |

**Table 2.** **Health Literacy and Preventive Health Behaviors against PM₂.₅ Exposure among Participants (n = 403)**

| **Variables** | **rs** | **p-value** |
| --- | --- | --- |
| **Gender** | 0.068 | 0.173 |
| **Age** | 0.059 | 0.238 |
| **Marital Status** | 0.087 | 0.081 |
| **Education level** | -0.204 | 0.000* |
| **Duration of residence in the community** | 0.018 | 0.719 |
| **Occupation** | -0.087 | 0.080 |
| **Average monthly income** | -0.056 | 0.264 |
| **Chronic conditions** | 0.099 | 0.047* |
| **Health literacy** | 0.733 | 0.000* |

*Correlation is significant at the .05 level.

**Table 3. Factors Associated with Preventive Health Behaviors against PM₂.₅ Exposure among Participants Using Spearman’s Rank Correlation Coefficient**

| **Variables** | **B** | **β ̂** | **t** | **95% CI of B** | **VIF** | **p-value** |
| --- | --- | --- | --- | --- | --- | --- |
| **Constant** | 0.898 |  | 10.900 | 0.736 to 1.060 |  | 0.000* |
| **Health literacy (X9)** | 0.760 | 0.875 | 34.966 | 0.717 to 0.802 | 1.017 | 0.000* |
| **Average monthly income (X7)** | 0.000 | 0.074 | 2.767 | 0.000 to 0.000 | 1.154 | 0.006* |
| **Duration of residence in the community (X5)** | -0.001 | -0.061 | -2.272 | -0.002 to 0.000 | 1.159 | 0.024* |
| R = 0.8686, R2 = 0.7544, R2 adj = 0.7526, F = 408.597, SE = 0.1857 | | | | | | |
| = 0.898 + 0.875 (X9) + 0.074 (X7) -0.061 (X5) | | | | | | |

* Significant at the .05 level

**Table 4. Factors Influencing Preventive Health Behaviors against PM₂.₅ Exposure among Participants: Stepwise Multiple Linear Regression Analysis (n = 403)**
